# Supplementary material for: Green synthesis of fluorescent carbon dots as an effective fluorescence probe for morin detection
Source: Royal Society of Chemistry journal article supplement (doi:10.1039/c8ay02361a), 2018-12-07
Supplement: c8ay02361a1.pdf [file c8ay02361a1.pdf]

## Electronic Supplementary Information

### Green synthesis of fluorescent Carbon dots as an effective fluorescence probe for morin detection

Lizhen Liu<sup>a</sup>, Zhi Mi<sup>a,\*</sup>, Qin Hu<sup>b</sup>, Caiqing Li<sup>a</sup>, Xiaohua Li<sup>a</sup>, Feng Feng<sup>a,\*</sup>

<sup>a</sup> Shanxi Datong University, Datong 037009, PR China. E-mail addresses: mizhi775@126.com (Z. Mi); feng-feng64@263.net (F. Feng). Tel.: +86-352- 7157968; Fax: +86-352- 6100028.

<sup>b</sup> Yangzhou University, College of Food Science and Engineering, Yangzhou, Jiangsu, 225001, PR China.

#### *Measurement of quantum yield*

The quantum yield ( $\Phi_S$ ) of the as-prepared CDs sample was determined by comparing the integrated fluorescence intensities and absorbance of the as-prepared CDs with the reference quinine sulfate. Quinine sulfate ( $\Phi_R = 0.54$ ) was dissolved in 0.10 M H<sub>2</sub>SO<sub>4</sub> (refractive index,  $\eta = 1.33$ ) while as-prepared CDs was dissolved in distilled water ( $\eta = 1.33$ ) at different concentrations. A lambda 35 UV spectrometer was used to determine the absorbance of the solution at 320 nm. A Hitachi F-2500 spectrofluorometer was used to record their fluorescence spectra at an excitation wavelength of 320 nm. The integrated fluorescence intensity was the area under the fluorescence curve in the wavelength range 340-620 nm. Then, a graph of integrated fluorescence intensity against absorbance was plotted. The  $\Phi_S$  of the as-prepared CDs was calculated using the equation:

$$\Phi_S = \Phi_R (Grad_S / Grad_R) (\eta^2_S / \eta^2_R)$$

Where the subscripts *S* and *R* refer to the sample CDs and reference, respectively. *Grad* is the gradient from the plot of integrated fluorescence intensity against absorbance, and  $\eta$  is the refractive index of the solvent. In order to minimize the self-absorption effect, the absorbance in the 10-mm path-length fluorescence cuvette was kept under 0.10 at the excitation wavelength [1,2].

#### References

- [1] Y. Yang, J. Cui, M. Zheng, C. Hu, S. Tan, Y. Xiao, Q. Yang, Y. Liu, Chem. Commun. 48 (2012) 380-382.
- [2] X. Zhai, P. Zhang, C. Liu, T. Bai, W. Li, L. Dai, W. Liu, Chem. Commun. 48 (2012) 7955-7957.

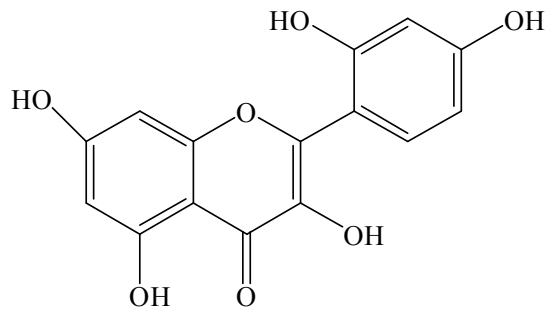

**Fig. S1.** Chemical structure of morin.

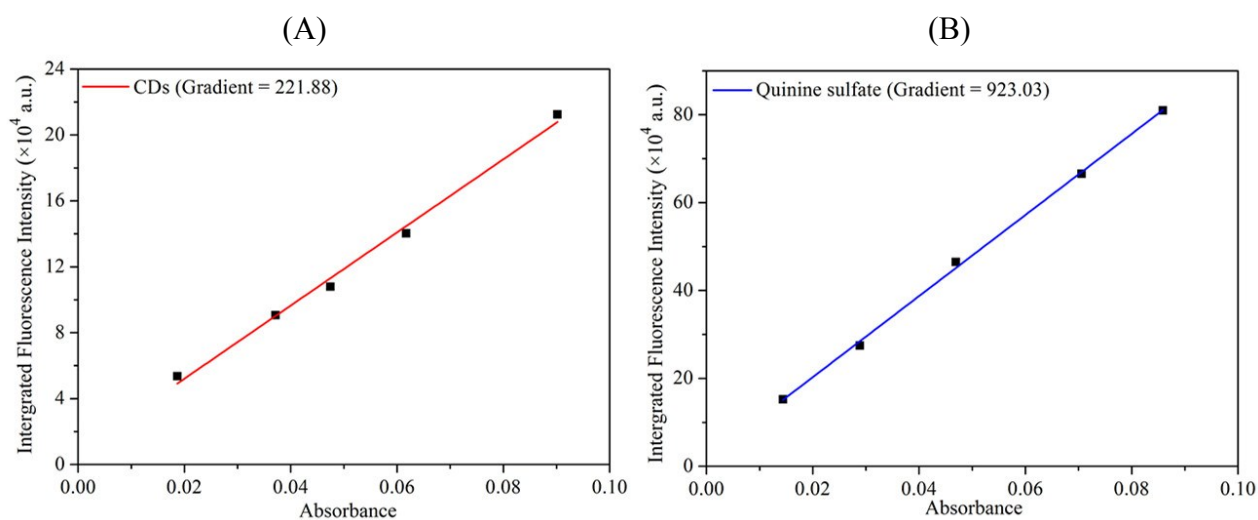

**Fig. S2.** Plots of integrated PL intensity against the absorbance of (A) CDs and (B) quinine sulfate.

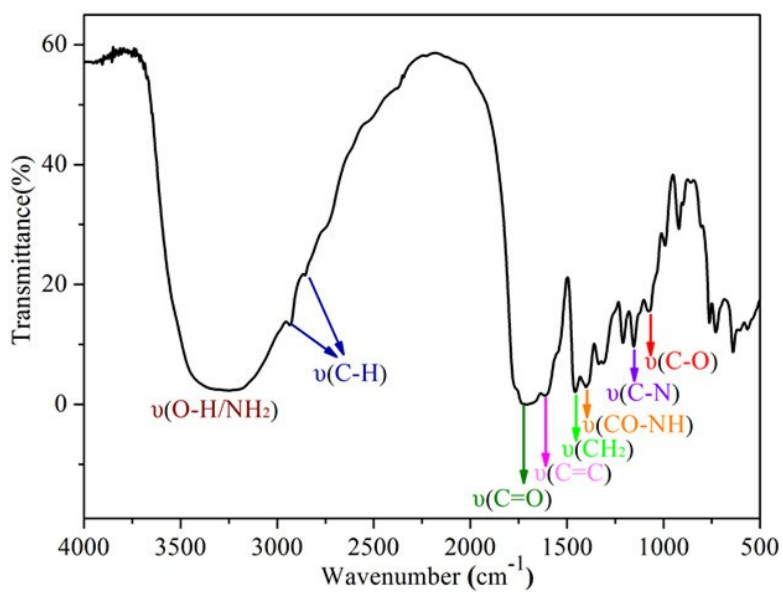

**Fig. S3.** IR spectrum of the CDs.

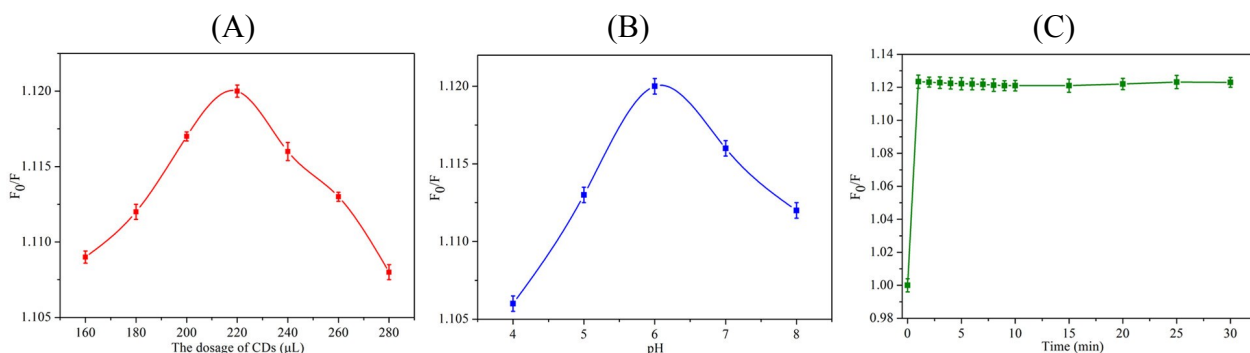

**Fig. S4.** Effect of (A) dosage of CDs, (B) pH and (C) reaction time on the relative fluorescence intensity ( $F_0/F$ ). 10  $\mu\text{M}$  morin and 0.01 M PBS solution are used for the experiments. The error bars represent the standard deviation of three measurements.

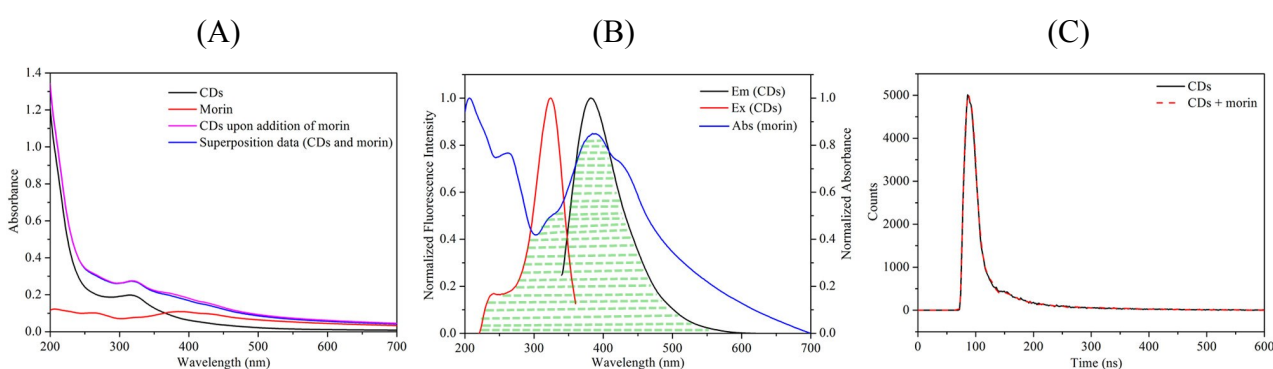

**Fig. S5.** (A) UV-vis absorption spectra of CDs, morin, CDs upon addition of morin and superposition data of CDs and morin. (B) The excitation and emission spectra of CDs and the UV-vis absorption spectra of morin. (C) Fluorescence decay curves of CDs in the absence and presence of morin under excitation wavelength of 320 nm.

**Table S1**

Comparison of the method with some reported methods for the determination of Morin.

| Methods          | Linear range ( $\mu\text{M}$ ) | LOD ( $\mu\text{M}$ ) | Reference |
|------------------|--------------------------------|-----------------------|-----------|
| HPLC-UV          | 0.33–230                       | 0.13                  | [6]       |
| HPLC-DAD         | 0.3–156                        | 0.066                 | [8]       |
| HPLC-UV          | 24–377                         | 0.76                  | [7]       |
| Electrochemistry | 4–1000                         | 1                     | [9]       |
| Electrochemistry | 1–400                          | 0.19                  | [10]      |
| Fluorescence     | 0–300                          | 0.6                   | [ 11 ]    |
| Fluorescence     | 0.4–60                         | 0.12                  | This work |

**Table S2**

The results of the determination of morin sample by this method.

| Morin sample | Added ( $\mu\text{M}$ ) | Average found ( $\mu\text{M}$ ) | Recovery (%) | RSD (%. $n=5$ ) |
|--------------|-------------------------|---------------------------------|--------------|-----------------|
| 1            | 12                      | 11.6                            | 96.7         | 1.1             |
| 2            | 28                      | 28.7                            | 102.5        | 1.8             |
| 3            | 52                      | 51.2                            | 98.5         | 2.3             |
